# Supplementary material
Source: MDPI journal article supplement (https://www.mdpi.com/2227-9717/12/3/530)

## Supplementary Material

### 1. Synthesis of ILs

1.1. The synthesis of didecyldimethylammonium propionate  $[N_{10,10,1,1}][C_2H_5COO]$ , ( $C_{22}H_{53}NO_2$ ),  $M = 399.79$  g/mol

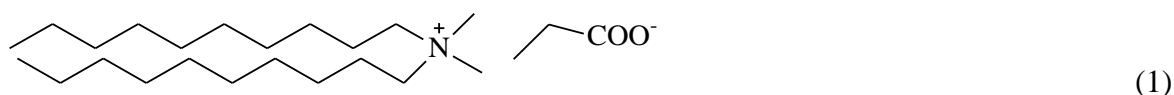

The reaction of propionic acid with potassium hydroxide

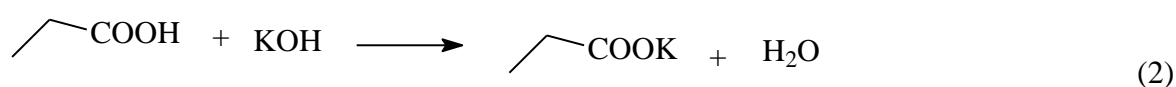

The reaction of didecyldimethylammonium chloride with potassium propionate

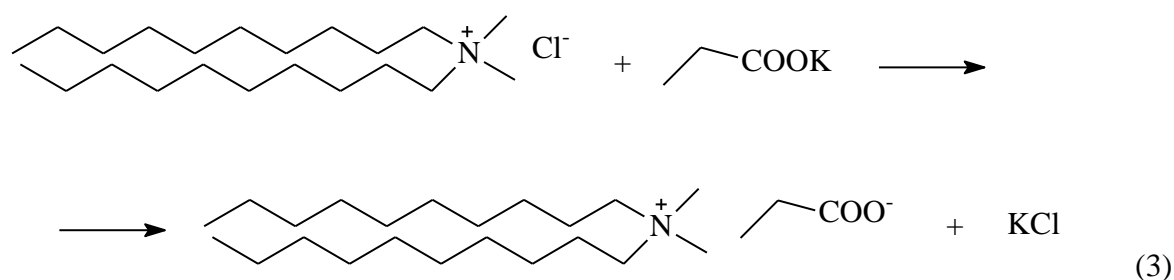

The 325.94 g of a 50% solution of didecyldimethylammonium chloride (162.97 g  $[N_{10,10,1,1}][Cl]$ , 0.45 mol) was added to potassium propionate obtained according to receipt: 33.33 g (0.45 mol) of propionic acid was added to 25.25 g (0.45 mol) of KOH and 75 cm<sup>3</sup> of water, after mixing at the temperature  $T = 333$  K for 5 h. The contents of the flask were stirred for 6 h at the temperature  $T = 333 - 334$  K. Water was removed by distillation under reduced pressure and the residue was dried under the pressure 1.3 hPa ( $T = 333$  K, 10 h). Next, 350 cm<sup>3</sup> of methanol was added to the residue, mixed and left at the temperature  $T = 253$  K for 20 h. The precipitated KCl was collected by the filtration and the filtrate was concentrated by the distillation of methanol under the reduced pressure. The IL was dried under the pressure 1.3

hPa for 10 h ( $T = 333$  K). The 172.5 g (0.43 mol) of didecyldimethylammonium propionate was obtained. Yield 95.56%.

NMR spectra were recorded on the spectrometer 300 MHz in the presence of tetramethylsilane

**Figure S1.** NMR of didecyldimethylammonium propionate,  $[N_{10,10,1,1}][C_2H_5COO]$ : a)  $^1H$  NMR; b)  $^{13}C$  NMR.

- a)  $^1H$  NMR ( $CDCl_3$ , 500 MHz),  $\delta$ : 0.77 (t, 6H,  $2 \times CH_3CH_2$ ,  $J = 7.0$  Hz), 0.98 (t, 3H,  $CH_3CH_2COO^-$ ,  $J = 7.6$  Hz), 1.07-1.22 (m, 20H,  $10 \times CH_2$ ), 1.22-1.31 (m, 8H,  $4 \times CH_2$ ), 1.52-1.62 (m, 4H,  $2 \times CH_2CH_2[N^+]$ ), 2.10 (q, 2H,  $CH_3CH_2COO^-$ ,  $J = 7.6$  Hz), 3.26 (s, 6H,  $2 \times CH_3[N^+]$ ), 3.32-3.35 (m, 4H,  $2 \times CH_2[N^+]$ ) ppm.

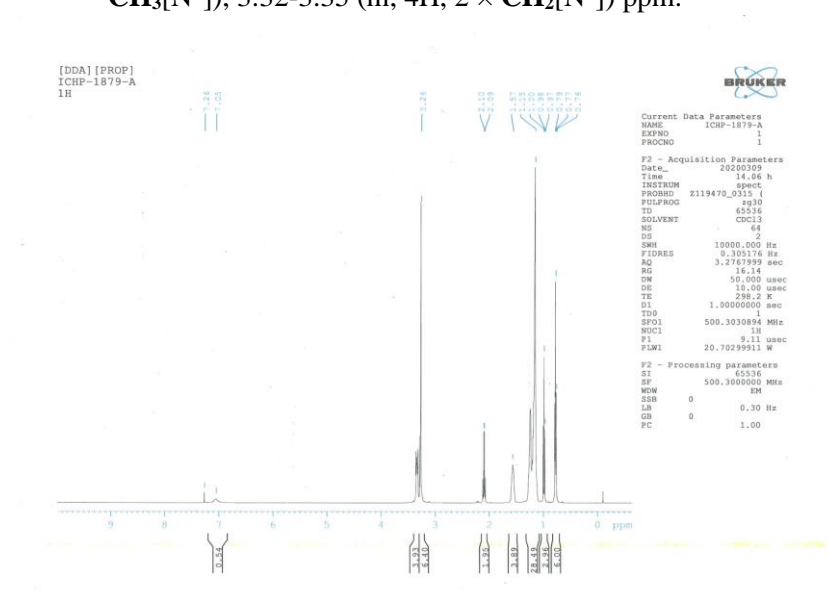

b)  $^{13}\text{C}$  NMR ( $\text{CDCl}_3$ , 125.8 MHz),  $\delta$ : 10.85 ( $\text{CH}_3$ ), 13.84 ( $2 \times \text{CH}_3$ ), 22.39 ( $2 \times \text{CH}_2$ ), 22.48 ( $2 \times \text{CH}_2$ ), 26.06 ( $2 \times \text{CH}_2$ ), 28.94 ( $2 \times \text{CH}_2$ ), 28.97 ( $2 \times \text{CH}_2$ ), 29.11 ( $2 \times \text{CH}_2$ ), 29.15 ( $2 \times \text{CH}_2$ ), 30.93 ( $\text{CH}_3\text{CH}_2\text{COO}^-$ ), 31.57 ( $2 \times \text{CH}_2$ ), 50.80 ( $2 \times \text{CH}_3$ ), 63.21 ( $2 \times \text{CH}_2$ ), 179.54 ( $\text{COO}^-$ ) ppm.

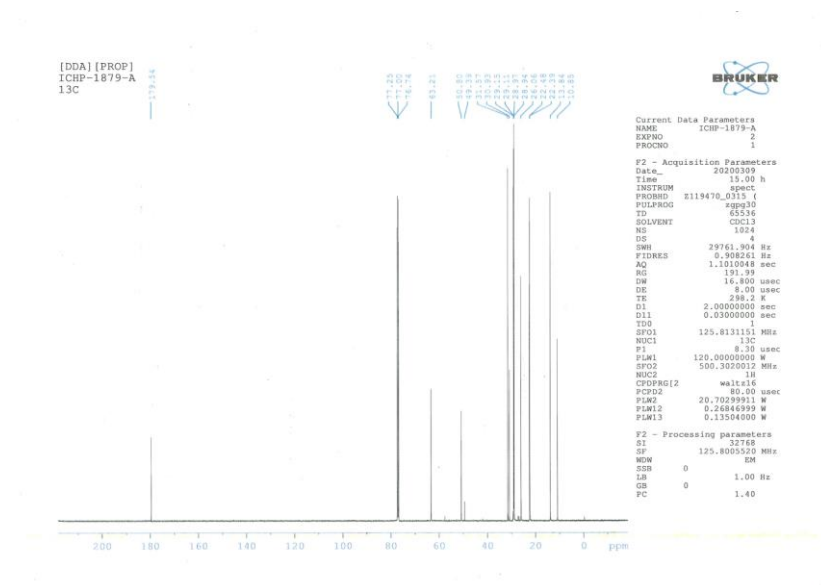

1.2. The synthesis of didecylmethylammonium hydrogen sulphate  $[N_{10,10,1,H}][\text{HSO}_4]$ ,  $M = 409,67 \text{ g/mol}$

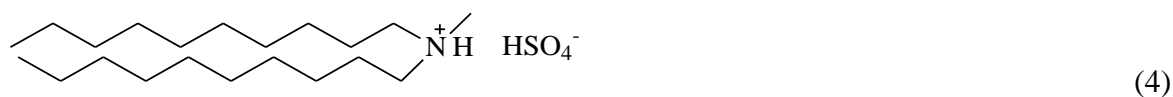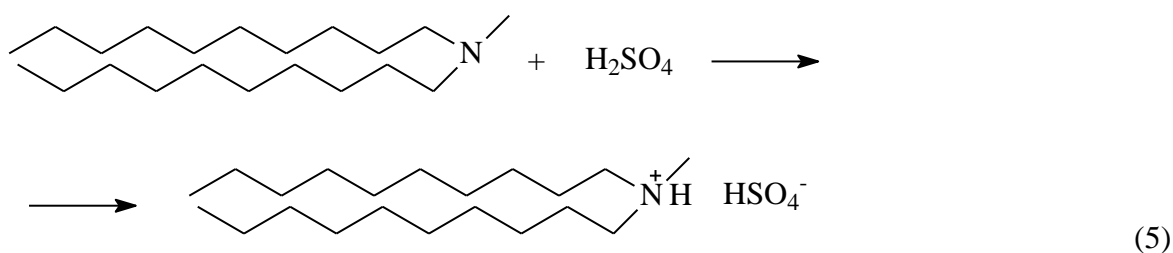

The 98.4 g of 95 wt % *N*-methyldidecylamine (0.3 mol) was placed in a 500 cm<sup>3</sup> three-neck flask equipped with a thermometer, reflux condenser, dropping funnel, magnetic stirrer and cooled in an ice-water bath. The 30.65 g of 96 wt% sulphuric acid (0.3 mol) dissolved in 250 cm<sup>3</sup> of water at the temperature  $T = 293\text{-}298 \text{ K}$ . A white solid product was formed during the addition of  $\text{H}_2\text{SO}_4$ . After the completion of the dropwise addition, the reaction mixture was

stirred at the temperature  $T = 293$ - $298$  K for 18 h. Next, water was separated by distillation under the reduced pressure. The residue was dried at the temperature  $T = 333$  K under the pressure 1.3 hPa (10 h). The 122.3 g (0.298 mol) of didecylmethylammonium hydrogen sulfate was obtained as a white solid. The yield 99%.

**Figure S2.** NMR of didecylmethylammonium hydrogen sulphate,  $[N_{10,10,1,H}][HSO_4]$ ,: a)  $^1H$  NMR; b)  $^{13}C$  NMR,

$^1H$  NMR (DMSO- $d_6$ , 500 MHz),  $\delta$ : 0.84 (t, 6H,  $2 \times CH_3CH_2$ ,  $J = 7.5$  Hz), 1.17-1.32 (m, 28H,  $14 \times CH_2$ ), 1.56-1.64 (m, 4H,  $2 \times CH_2CH_2[NH^+]$ ), 2.70 (s, 3H,  $CH_3[NH^+]$ ), 2.97-3.00 (m, 4H,  $2 \times CH_2[N^+]$ ), 9.21 (s, 2H,  $NH^+$  and  $HSO_4^-$ ) ppm.

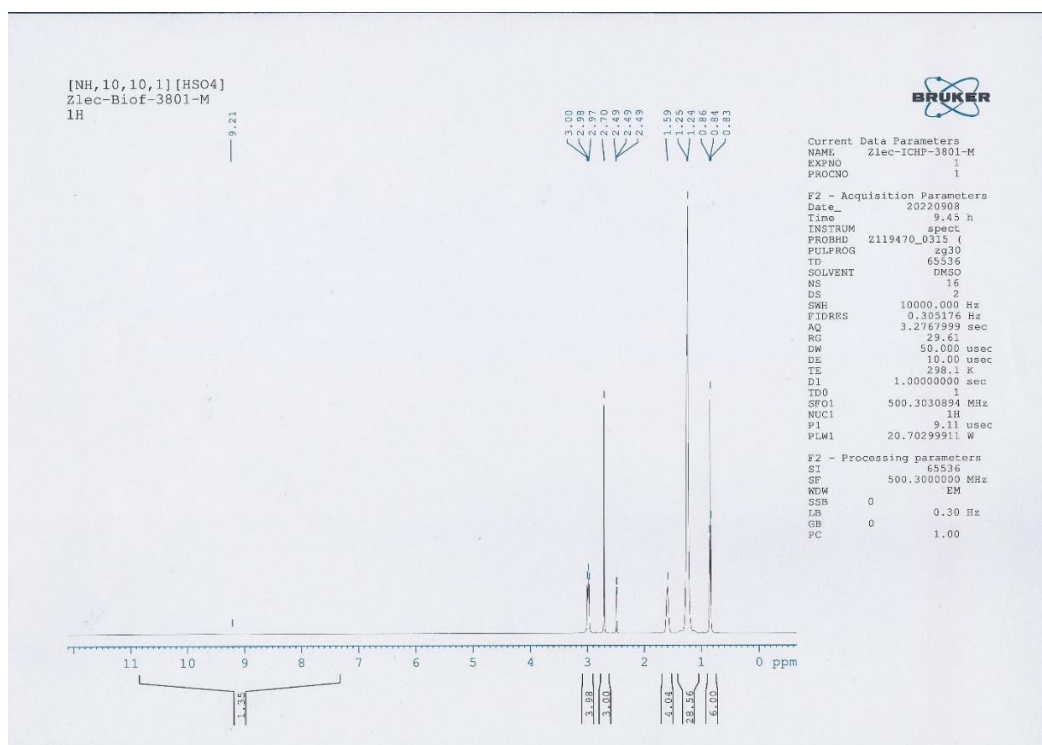

$^{13}C$  NMR (DMSO- $d_6$ , 125.8 MHz),  $\delta$ : 13.90 ( $2 \times CH_3$ ), 22.10 ( $2 \times CH_2$ ), 23.25 ( $2 \times CH_2$ ), 25.99 ( $2 \times CH_2$ ), 28.55 ( $2 \times CH_2$ ), 28.69 ( $2 \times CH_2$ ), 28.86 ( $2 \times CH_2$ ), 28.93 ( $2 \times CH_2$ ), 31.30 ( $2 \times CH_2$ ), 39.33 ( $CH_3[NH^+]$ ), 54.89 ( $2 \times CH_2[NH^+]$ ) ppm.

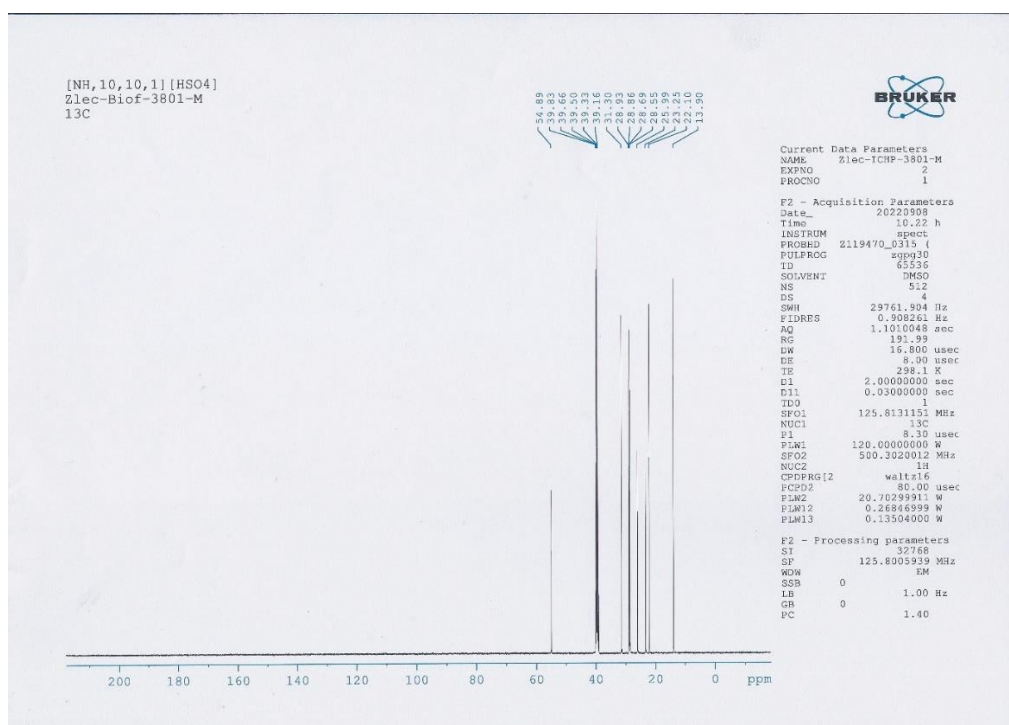

NMR spectra were recorded on spectrometer Avance Bruker 500 MHz in the presence tetramethylsilane (TMS) as an internal standard.

### 1.3. The synthesis of didecyldimethylammonium dihydrogen phosphate $[N_{10,10,1,1}][H_2PO_4]$

$(C_{22}H_{50}NO_4P)$ ,  $M = 423.7$  g/mol

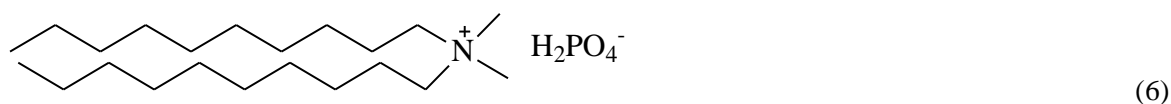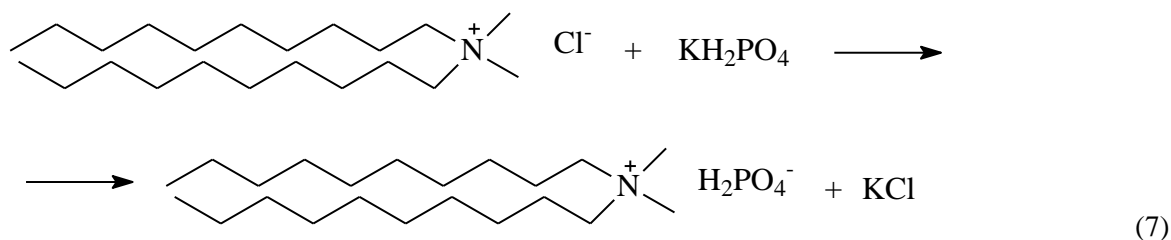

The 27.22 g (0.2 mol) of potassium dihydrogen phosphate was placed in 500 cm<sup>3</sup> reaction flask. Next 75 cm<sup>3</sup> of deionized water was added and heated to the temperature  $T = 333$  K. Then, 144.86 g of a 50 wt% solution of didecyldimethylammonium chloride (72.43 g  $[N_{10,10,1,1}][Cl]$ , 0.2 mol) was added. The contents of the flask were stirred for 8 h at the temperature  $T = 343$  K.

Cloudiness occurred upon stirring and two phases appeared. The mixture was cooled to the temperature  $T = 303$  K and next two phases were separated. The upper phase containing IL was concentrated by the distillation of water under the reduced pressure and the residue was dried under the pressure 1.3 hPa (333 K, 10 h). 80 cm<sup>3</sup> of methanol was added to the residue, mixed and frozen to the temperature  $T = 253$  K and left for 15 h. The precipitated KCl was collected by the filtration and the filtrate was concentrated by the distillation of methanol under the reduced pressure. The IL was dried under pressure 1.3 hPa for 10 h (333 K). 68.2 g (0,161 mol) of didecyldimethylammonium dihydrogen phosphate was obtained. Yield 80.5%.

NMR spectra were recorded on the spectrometer 300 MHz in the presence of tetramethylsilane

**Figure S3.** NMR of didecyldimethylammonium dihydrogen phosphate, [N<sub>10,10,1,1</sub>][H<sub>2</sub>PO<sub>4</sub>]: a) <sup>1</sup>H NMR; b) <sup>13</sup>C NMR, c) <sup>31</sup>P NMR

- a) <sup>1</sup>H NMR (300 MHz, DMSO-d<sub>6</sub>),  $\delta$ : 0.85 (t, 6H, 2  $\times$  CH<sub>3</sub>CH<sub>2</sub>, J = 6.8 Hz), 1.18-1.35 (m, 28H, 14  $\times$  CH<sub>2</sub>), 1.56-1.69 (m, 4H, 2  $\times$  CH<sub>2</sub>CH<sub>2</sub>[N<sup>+</sup>]), 3.03 (s, 6H, 2  $\times$  CH<sub>3</sub>[N<sup>+</sup>]), 3.25-3.31 (m, 4H, 2  $\times$  CH<sub>2</sub>[N<sup>+</sup>]), 3.75 (s, 2H, H<sub>2</sub>PO<sub>4</sub><sup>-</sup>) ppm.

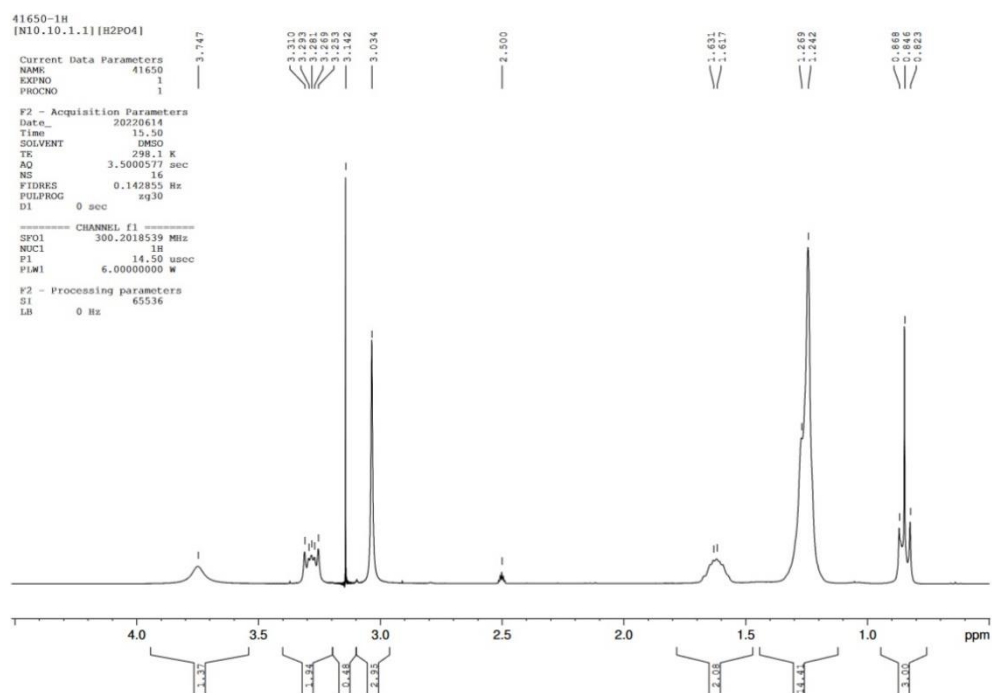

- b)  $^{13}\text{C}$  NMR (75.5 MHz, DMSO- $d_6$ ),  $\delta$ : 13.89 ( $2 \times \text{CH}_3\text{CH}_2$ ), 21.67 ( $2 \times \text{CH}_2$ ), 22.09 ( $2 \times \text{CH}_2$ ), 25.77 ( $2 \times \text{CH}_2$ ), 28.48 ( $2 \times \text{CH}_2$ ), 28.68 ( $2 \times \text{CH}_2$ ), 28.82 ( $2 \times \text{CH}_2$ ), 28.91 ( $2 \times \text{CH}_2$ ), 31.29 ( $2 \times \text{CH}_2$ ), 49.88 ( $2 \times \text{CH}_3[\text{N}^+]$ ), 62.61 ( $2 \times \text{CH}_2[\text{N}^+]$ ) ppm.

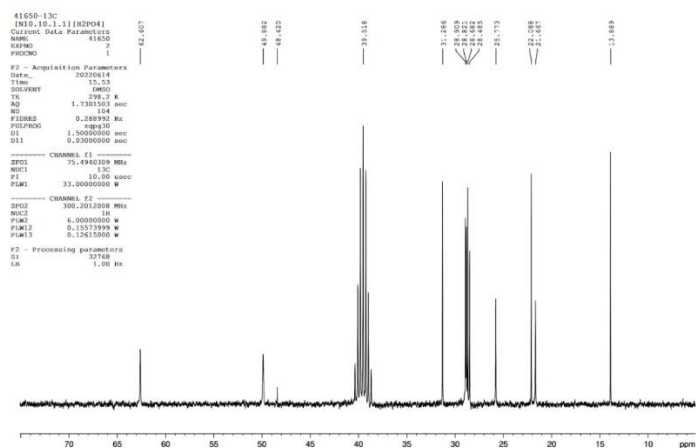

c)  $^{31}\text{P}$  NMR (121.5 MHz, DMSO- $d_6$ ),  $\delta$ : 0.52 ( $\text{H}_2\text{PO}_4^-$ ) ppm.

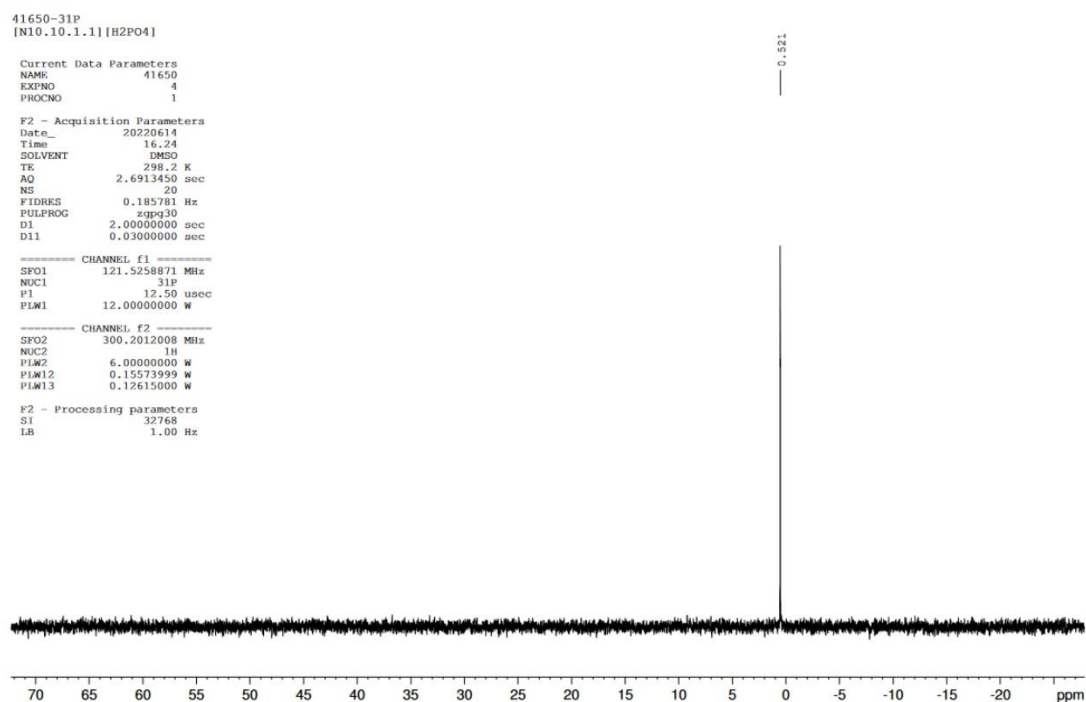

#### 1.4. The synthesis of tetrabutylphosphonium dihydrogen phosphate [ $\text{P}_{4,4,4,4}$ ][ $\text{H}_2\text{PO}_4$ ]

( $\text{C}_{16}\text{H}_{38}\text{O}_4\text{P}_2$ ),  $M = 356.48$  g/mol

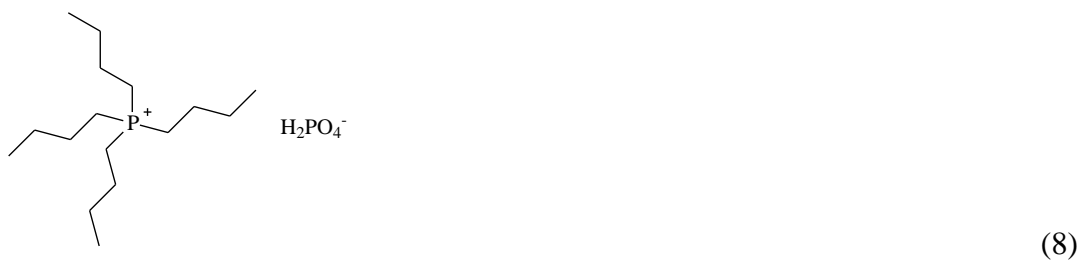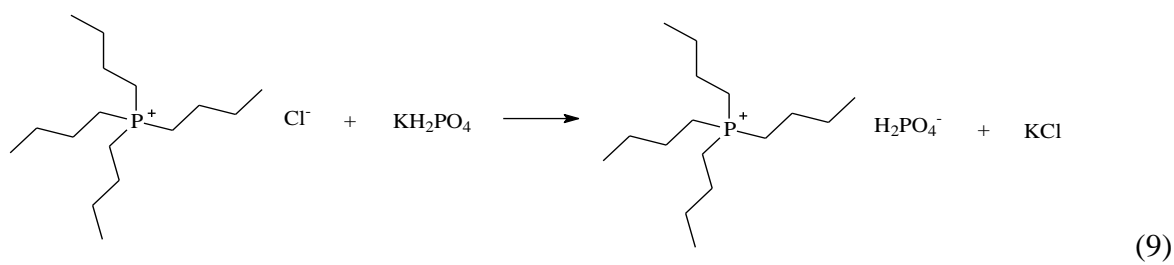

In 250 cm<sup>3</sup> reaction flask a solution of tetrabutylphosphonium chloride (58.98 g, 0.2 mol) in deionized water (60 cm<sup>3</sup>) was placed and heated to the temperature  $T = 333$  K. A solution of potassium dihydrogen phosphate (27.22 g, 0.2 mol) in deionized water (80 cm<sup>3</sup>) was heated to the temperature  $T = 333$  K and slowly added to the solution of tetrabutylphosphonium chloride. After addition of the solution of KH<sub>2</sub>PO<sub>4</sub>, turbidity appeared and two phases separated. The contents of the flask were stirred at the temperature  $T = 343$  K for 8 h. The reaction mixture was cooled to the temperature  $T = 303$  K and two phases were separated. The slightly colored upper phase containing the IL was concentrated by the distillation of water under reduced pressure and the residue was dried at the temperature  $T = 333$  K for 10 h (1.3 hPa). 80 cm<sup>3</sup> of methanol was added to the residue, mixed and frozen to the temperature  $T = 253$  K and left at this temperature for 15 h. The precipitated KCl was collected by the filtration and the filtrate was concentrated by the distillation of methanol under the reduced pressure. The IL was dried under the pressure 1.3 hPa for 10 h (333 K). 55.6 g (0.156 mol) of tetrabutylphosphonium dihydrogen phosphate was obtained. Yield 78%.

NMR spectra were recorded on the spectrometer 300 MHz in the presence of tetramethylsilane

**Figure S4.** NMR of tetrabutylphosphonium dihydrogen phosphate [P<sub>4,4,4,4</sub>][H<sub>2</sub>PO<sub>4</sub>]: a) <sup>1</sup>H NMR; b) <sup>13</sup>C NMR, c) <sup>31</sup>P NMR

<sup>1</sup>H NMR (300 MHz, DMSO-d<sub>6</sub>),  $\delta$ : 0.90 (t, 12H, 4  $\times$  CH<sub>3</sub>, J = 7.0 Hz), 1.32-1.51 (m, 16H, 8  $\times$  CH<sub>2</sub>), 2.20-2.30 (m, 8H, 4  $\times$  CH<sub>2</sub>[P<sup>+</sup>]), 3.63 (s, 2H, H<sub>2</sub>PO<sub>4</sub><sup>-</sup>) ppm.

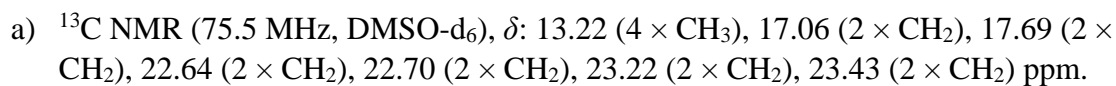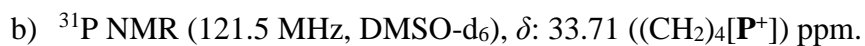

41649-31P  
[P4.4.4.4][R2P04]  
Current Data Parameters  
NAME 41649  
EXPNO 4  
PROCNO 1  
F2 - Acquisition Parameters  
Date\_ 20220614  
Time 16.16  
SOLVENT H<sub>2</sub>O  
TE 298.2 K  
AQ 2.7131903 sec  
RG 3.4  
FIDRES 0.184285 Hz  
PCPUSC 0.0000000 sec  
D1 2.0000000 sec  
d11 0.3000000 sec  
CHANNEL f1  
SFO1 121.5258871 MHz  
NUC1 31P  
P1 12.50 usec  
PLA1 12.0000000 W  
CHANNEL f2  
SFO2 300.2012008 MHz  
NUC2 1H  
PLA2 6.0000000 W  
PLA12 0.15573999 W  
PLA13 0.12615000 W  
F2 - Processing parameters  
SI 32768  
LB 1.00 Hz

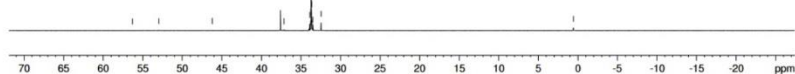

Supplement: s1 [file s1 › processes-2849678-supplementary.pdf]
